# Supplementary material
Source: PubMed Central journal article supplement (PMC4609725)
Supplement: JCM.01714-15_zjm999094531so1.pdf [file JCM.01714-15_zjm999094531so1.pdf]

Supplementary Table 1: Clinical and reference strains of *Mycobacterium abscessus* group with sub species level identification, *erm*(41) and *rrl* SNPs and clarithromycin MICs.

| Isolate                           | Identification        | SybrGreen Tm <i>erm</i> (41) (melt curve) | SybrGreen <i>erm</i> (41) | <i>erm</i> (41) at position 28 SNP | Sequenced <i>erm</i> (41) at position 28th | 23S rRNA position 2058 and 2059 SNP | Sequenced 23S rRNA position 2058 | Sequenced 23S rRNA position 2059 | Clarithromycin susceptibility at 3-5 days | Clarithromycin susceptibility at 14 days |
|-----------------------------------|-----------------------|-------------------------------------------|---------------------------|------------------------------------|--------------------------------------------|-------------------------------------|----------------------------------|----------------------------------|-------------------------------------------|------------------------------------------|
| <i>M. abscessus</i> ATCC 19977T   | <i>M. abscessus</i>   | 85.3                                      | Full length               | T                                  | T                                          | AA                                  | A                                | A                                | 1.0 (S)                                   | >16 (R)                                  |
| <i>M. massiliense</i> CCUG 48898T | <i>M. massiliense</i> | 78.3                                      | Truncated                 | T                                  | T                                          | AA                                  | A                                | A                                | 0.2 (S)                                   | 1.0 (S)                                  |
| <i>M. bolletii</i> CCUG 50184T    | <i>M. bolletii</i>    | 85.5                                      | Full length               | T                                  | T                                          | AA                                  | A                                | A                                | 1.0 (S)                                   | >16 (R)                                  |
| CI1-1                             | <i>M. massiliense</i> | 78.7                                      | Truncated                 | T                                  | T                                          | GA                                  | G                                | A                                | >8 (R)                                    |                                          |
| CI4-1                             | <i>M. abscessus</i>   | 86.3                                      | Full length               | T                                  | T                                          | AA                                  | A                                | A                                | 0.25 (S)                                  | >16 (R)                                  |
| CI4-3                             | <i>M. abscessus</i>   | 85.4                                      | Full length               | T                                  | T                                          | AA                                  | A                                | A                                | 0.5 (S)                                   | >16 (R)                                  |
| CI4-5                             | <i>M. abscessus</i>   | 85.5                                      | Full length               | T                                  | T                                          | AA                                  | A                                | A                                | 2.0 (S)                                   | >16 (R)                                  |
| CI5-7                             | <i>M. abscessus</i>   | 85.8                                      | Full length               | T                                  | T                                          | GA                                  | G                                | A                                | 8 (R)                                     |                                          |
| CI5-8                             | <i>M. abscessus</i>   | 85.5                                      | Full length               | T                                  | T                                          | AA                                  | A                                | A                                | 1 (S)                                     | >16 (R)                                  |
| CI5-9                             | <i>M. bolletii</i>    | 85.4                                      | Full length               | T                                  | T                                          | AA                                  | A                                | A                                | 0.5 (S)                                   | >16 (R)                                  |
| CI5-10                            | <i>M. massiliense</i> | 78.4                                      | Truncated                 | T                                  | T                                          | AA                                  | A                                | A                                | <=0.12 (S)                                | 0.25 (S)                                 |
| CI6-2                             | <i>M. abscessus</i>   | 86.0                                      | Full length               | C                                  | C                                          | AA                                  | A                                | A                                | 0.25 (S)                                  | 0.25 (S)                                 |
| CI6-3                             | <i>M. abscessus</i>   | 85.1                                      | Full length               | T                                  | T                                          | CA                                  | C                                | A                                | >8 (R)                                    |                                          |
| CI6-4                             | <i>M. abscessus</i>   | 85.5                                      | Full length               | T                                  | T                                          | AA                                  | A                                | A                                | 0.5 (S)                                   | >16 (R)                                  |
| CI6-5                             | <i>M. abscessus</i>   | 86.0                                      | Full length               | T                                  | T                                          | AA                                  | A                                | A                                | 0.12 (S)                                  | >16 (R)                                  |
| CI6-6                             | <i>M. abscessus</i>   | 85.9                                      | Full length               | C                                  | C                                          | AA                                  | A                                | A                                | 0.25 (S)                                  | 2.0 (S)                                  |
| CI6-7                             | <i>M. abscessus</i>   | 85.6                                      | Full length               | T                                  | T                                          | AA                                  | A                                | A                                | 1 (S)                                     | >16 (R)                                  |
| CI6-8                             | <i>M. abscessus</i>   | 85.7                                      | Full length               | T                                  | T                                          | AA                                  | A                                | A                                | <=0.12 (S)                                | >16 (R)                                  |
| CI6-9                             | <i>M. abscessus</i>   | 86.0                                      | Full length               | T                                  | T                                          | AA                                  | A                                | A                                | 2.0 (S)                                   | >16 (R)                                  |
| CI6-10                            | <i>M. abscessus</i>   | 85.9                                      | Full length               | T                                  | T                                          | AA                                  | A                                | A                                | 1.0 (S)                                   | >16 (R)                                  |
| CI6-11                            | <i>M. abscessus</i>   | 85.4                                      | Full length               | T                                  | T                                          | AA                                  | A                                | A                                | 2.0 (S)                                   | >16 (R)                                  |
| CI6-13                            | <i>M. abscessus</i>   | 85.1                                      | Full length               | T                                  | T                                          | AA                                  | A                                | A                                | 1.0 (S)                                   | >16 (R)                                  |
| CI6-14                            | <i>M. massiliense</i> | 78.0                                      | Truncated                 | T                                  | T                                          | GA                                  | G                                | A                                | >16 (R)                                   |                                          |
| CI6-15                            | <i>M. massiliense</i> | 78.2                                      | Truncated                 | T                                  | T                                          | GA                                  | G                                | A                                | >8 (R)                                    |                                          |
| CI7-1                             | <i>M. massiliense</i> | 78.4                                      | Truncated                 | T                                  | T                                          | AA                                  | A                                | A                                | 0.25 (S)                                  | 0.5 (S)                                  |
| CI7-2                             | <i>M. massiliense</i> | 78.5                                      | Truncated                 | T                                  | T                                          | AA                                  | A                                | A                                | 0.125 (S)                                 | 0.25 (S)                                 |
| CI7-3                             | <i>M. massiliense</i> | 78.6                                      | Truncated                 | T                                  | T                                          | GA                                  | G                                | A                                | >8 (R)                                    |                                          |
| CI7-4                             | <i>M. massiliense</i> | 78.3                                      | Truncated                 | T                                  | T                                          | AA                                  | A                                | A                                | <=0.12 (S)                                | 0.12 (S)                                 |
| CI7-5                             | <i>M. massiliense</i> | 78.2                                      | Truncated                 | T                                  | T                                          | AA                                  | A                                | A                                | 0.12 (S)                                  | 1.0 (S)                                  |
| CI7-6                             | <i>M. massiliense</i> | 78.3                                      | Truncated                 | T                                  | T                                          | AA                                  | A                                | A                                | <=0.12 (S)                                | 0.5 (S)                                  |
| CI7-8                             | <i>M. bolletii</i>    | 85.0                                      | Full length               | T                                  | T                                          | AA                                  | A                                | A                                | 0.12 (S)                                  | >16 (R)                                  |
| CI7-9                             | <i>M. abscessus</i>   | 85.8                                      | Full length               | C                                  | C                                          | AA                                  | A                                | A                                | 0.25 (S)                                  | 1.0 (S)                                  |
| CI12-1                            | <i>M. abscessus</i>   | 86.4                                      | Full length               | C                                  | C                                          | AA                                  | A                                | A                                | 0.25 (S)                                  | 1.0 (S)                                  |
| CI12-2                            | <i>M. massiliense</i> | 78.6                                      | Truncated                 | T                                  | T                                          | AA                                  | A                                | A                                | 0.5 (S)                                   | 1.0 (S)                                  |
| CI12-8                            | <i>M. abscessus</i>   | 86.2                                      | Full length               | T                                  | T                                          | AA                                  | A                                | A                                | 1 (S)                                     | >16 (R)                                  |
| CI12-9                            | <i>M. abscessus</i>   | 85.9                                      | Full length               | T                                  | T                                          | AA                                  | A                                | A                                | 2.0 (S)                                   | >16 (R)                                  |
| CI12-10                           | <i>M. massiliense</i> | 78.6                                      | Truncated                 | T                                  | T                                          | AA                                  | A                                | A                                | 0.12 (S)                                  | 0.12 (S)                                 |
| CI12-13                           | <i>M. abscessus</i>   | 85.5                                      | Full length               | T                                  | T                                          | AA                                  | A                                | A                                | 0.5 (S)                                   | >16 (R)                                  |
| CI12-14                           | <i>M. abscessus</i>   | 86.4                                      | Full length               | T                                  | T                                          | AA                                  | A                                | A                                | <=0.12 (S)                                | >16 (R)                                  |
| CI12-15                           | <i>M. abscessus</i>   | 86.3                                      | Full length               | T                                  | T                                          | AA                                  | A                                | A                                | <0.12 (S)                                 | >16 (R)                                  |
| CI12-16                           | <i>M. abscessus</i>   | 85.8                                      | Full length               | T                                  | T                                          | AA                                  | A                                | A                                | 2.0 (S)                                   | >16 (R)                                  |

|          |                       |      |             |   |   |    |   |   |            |          |
|----------|-----------------------|------|-------------|---|---|----|---|---|------------|----------|
| CI12-17  | <i>M. abscessus</i>   | 86.8 | Full length | T | T | AA | A | A | 0.5 (S)    | >16 (R)  |
| CI12-18  | <i>M. abscessus</i>   | 85.9 | Full length | T | T | AA | A | A | 1.0 (S)    | >16 (R)  |
| CI12-19  | <i>M. abscessus</i>   | 86.6 | Full length | T | T | AA | A | A | <=0.25 (S) | >16 (R)  |
| CI12-20  | <i>M. abscessus</i>   | 85.9 | Full length | T | T | AA | A | A | 0.25 (S)   | >16 (R)  |
| CI15-1   | <i>M. massiliense</i> | 78.5 | Truncated   | T | T | GA | G | A | >16 (R)    |          |
| CI15-4   | <i>M. massiliense</i> | 78.7 | Truncated   | T | T | AA | A | A | 0.12 (S)   | 0.25 (S) |
| CI20-1   | <i>M. abscessus</i>   | 85.5 | Full length | T | T | AA | A | A | 0.25 (S)   | >16 (R)  |
| CI20-2#  | <i>M. abscessus</i>   | 85.3 | Full length | T | T | AA | A | A | 4 (I)#     | 16 (R)   |
| CI20-3   | <i>M. abscessus</i>   | 85.7 | Full length | T | T | AA | A | A | 0.25 (S)   | 16 (R)   |
| CI20-4   | <i>M. abscessus</i>   | 85.9 | Full length | T | T | AA | A | A | 0.5 (S)    | 16 (R)   |
| CI20-5   | <i>M. abscessus</i>   | 86.1 | Full length | T | T | AA | A | A | 0.25 (S)   | >16 (R)  |
| CI20-6#  | <i>M. abscessus</i>   | 86.0 | Full length | T | T | AA | A | A | 2.0 (S)#   | 8 (R)    |
| CI20-7   | <i>M. abscessus</i>   | 86.0 | Full length | T | T | AA | A | A | 0.25 (S)   | >16 (R)  |
| CI20-8#  | <i>M. abscessus</i>   | 86.6 | Full length | T | T | AA | A | A | 1 (S)#     | >16 (R)  |
| CI20-9   | <i>M. abscessus</i>   | 85.7 | Full length | T | T | AA | A | A | 0.12 (S)   | >16 (R)  |
| CI20-10# | <i>M. abscessus</i>   | 85.5 | Full length | T | T | AA | A | A | 1 (S)#     | >16 (R)  |
| CI20-11# | <i>M. abscessus</i>   | 85.8 | Full length | T | T | AA | A | A | 2 (S)#     | >16 (R)  |
| CI20-12# | <i>M. abscessus</i>   | 85.8 | Full length | T | T | AA | A | A | 1 (S)#     | >16 (R)  |
| CI20-13  | <i>M. abscessus</i>   | 85.8 | Full length | T | T | AA | A | A | 2 (S)      | >16 (R)  |
| CI20-14  | <i>M. abscessus</i>   | 85.7 | Full length | T | T | AA | A | A | 0.5 (S)    | >16 (R)  |
| CI20-15* | <i>M. abscessus</i>   | 85.3 | Full length | T | T | AA | A | A | 4 (I)*     | >16 (R)  |
| CI20-16  | <i>M. abscessus</i>   | 85.4 | Full length | T | T | GA | G | A | >16 (R)    |          |
| CI20-18  | <i>M. abscessus</i>   | 85.4 | Full length | T | T | GA | G | A | >16 (R)    |          |
| CI20-19  | <i>M. abscessus</i>   | 86.4 | Full length | T | T | AA | A | A | 1.0 (S)    | >16 (R)  |
| CI20-20  | <i>M. abscessus</i>   | 86.9 | Full length | T | T | AA | A | A | 0.25 (S)   | >16 (R)  |
| CI20-21  | <i>M. abscessus</i>   | 85.7 | Full length | T | T | AA | A | A | 0.25 (S)   | >16 (R)  |
| CI20-23  | <i>M. abscessus</i>   | 85.6 | Full length | T | T | AA | A | A | 2 (S)      | >16 (R)  |
| CI20-24# | <i>M. abscessus</i>   | 85.8 | Full length | T | T | AA | A | A | 4 (I)#     | >16 (R)  |
| CI20-25  | <i>M. abscessus</i>   | 85.6 | Full length | T | T | CA | C | A | >16 (R)    |          |
| CI20-26  | <i>M. massiliense</i> | 78.2 | Truncated   | T | T | GA | G | A | >16 (R)    |          |
| CI20-27* | <i>M. bolletii</i>    | 86.1 | Full length | T | T | AA | A | A | 8 (R)*     | >16 (R)  |
| CI20-28  | <i>M. massiliense</i> | 78.5 | Truncated   | T | T | AA | A | A | 0.12 (S)   | 0.12 (S) |
| CI20-29  | <i>M. massiliense</i> | 77.8 | Truncated   | T | T | AA | A | A | 0.5 (S)    | 0.5 (S)  |
| CI20-30  | <i>M. abscessus</i>   | 85.4 | Full length | T | T | AA | A | A | 0.25 (S)   | >16 (R)  |
| CI20-31  | <i>M. abscessus</i>   | 85.7 | Full length | T | T | AA | A | A | 0.25 (S)   | >16 (R)  |
| CI20-32* | <i>M. abscessus</i>   | 85.6 | Full length | T | T | AA | A | A | 8 (R)*     | >16 (R)  |
| CI20-33* | <i>M. abscessus</i>   | 85.0 | Full length | T | T | AA | A | A | 8 (R)*     | >16 (R)  |
| CI20-34  | <i>M. massiliense</i> | 78.4 | Truncated   | T | T | GA | G | A | 16 (R)     |          |
| CI20-35  | <i>M. abscessus</i>   | 85.7 | Full length | T | T | AA | A | A | 1 (S)      | 16 (R)   |
| CI20-36  | <i>M. abscessus</i>   | 86.0 | Full length | T | T | AG | A | G | 16 (R)     |          |
| CI20-37  | <i>M. abscessus</i>   | 85.6 | Full length | T | T | CA | C | A | 16 (R)     |          |
| CI20-38  | <i>M. bolletii</i>    | 85.4 | Full length | T | T | AA | A | A | 1 (S)      | 16 (R)   |
| CI20-39* | <i>M. massiliense</i> | 86.3 | Full length | T | T | AA | A | A | 16 (R)*    |          |
| CI20-40  | <i>M. massiliense</i> | 85.5 | Full length | T | T | AA | A | A | 0.5 (S)    | >16 (R)  |
| CI20-41  | <i>M. massiliense</i> | 78.4 | Truncated   | T | T | AA | A | A | 0.12 (S)   | 0.25 (S) |
| CI20-42  | <i>M. massiliense</i> | 78.8 | Truncated   | T | T | GA | G | A | >16 (R)    |          |
| CI20-43  | <i>M. abscessus</i>   | 86.5 | Full length | C | C | AA | A | A | 1.0 (S)    | 1.0 (S)  |
| CI20-44* | <i>M. abscessus</i>   | 86.2 | Full length | T | T | AA | A | A | >16 (R)*   |          |
| CI81-82  | <i>M. massiliense</i> | 86.6 | Full length | T | T | AA | A | A | 2.0 (S)    | 16 (R)   |

S = Sensitive, I = Intermediate, R = Resistant, \* = early inducible resistance, # = slow growing isolates
